# Supplementary material for: Genome-Wide Association Study Provides Insights into Important Genes for Reproductive Traits in Nelore Cattle
Source: MDPI journal article supplement (doi:10.3390/ani11051386), 2021-05-13
Supplement: s1 [file s1]

# Supplementary Materials: Genome-Wide Association Study Provides Insights into Important Genes for Reproductive Traits in Nelore Cattle

Ana Paula Sbardella, Rafael Nakamura Watanabe, Rebeka Magalhães da Costa, Priscila Arrigucci Bernardes, Larissa Graciano Braga, Fernando Sebastián Baldi Rey, Raysildo Barbosa Lôbo and Danísio Prado Munari

**Table S1.** Estimations of genetic variance ( $\sigma_a^2$ ), genetic variance of maternal effect ( $\sigma_m^2$ ), genetic standard deviation ( $\sigma_a$ ), genetic standard deviation of maternal effect ( $\sigma_m$ ), residual variance ( $\sigma_e^2$ ), residual standard deviation ( $\sigma_e$ ), heritability ( $h_a^2$ ) and heritability of maternal effect ( $h_m^2$ ) for scrotal circumference at 365 days of age (SC365), scrotal circumference at 450 days of age (SC450), gestation length (GL), as a calf trait, age at first calving (AFC), accumulated productivity (ACP), early calving until 30 months (HC30) and stayability (STAY).

| Parameters   | Variance components and heritability estimates |         |         |         |         |           |           |
|--------------|------------------------------------------------|---------|---------|---------|---------|-----------|-----------|
|              | SC355                                          | SC450   | GL      | AFC     | ACP     | HC30      | STAY      |
| $\sigma_a^2$ | 1.2752                                         | 2.7342  | 17.149  | 3.1291  | 117.840 | 1.847     | 0.4163    |
| $\sigma_m^2$ | -                                              | -       | 1.549   | -       | -       | -         | -         |
| $\sigma_a$   | 0.10086                                        | 0.20396 | 1.5803  | 0.347   | 19.634  | 0.402     | 5.567E-02 |
| $\sigma_m$   | -                                              | -       | 0.45191 | -       | -       | -         | -         |
| $\sigma_e^2$ | 1.9038                                         | 2.8895  | 14.875  | 16.272  | 542.710 | 1.002     | 1.009     |
| $\sigma_e$   | 7.63E-02                                       | 0.1496  | 0.90241 | 0.32625 | 18.649  | 3.865E-02 | 1.801E-02 |
| $h_a^2$      | 0.401                                          | 0.486   | 0.511   | 0.161   | 0.178   | 0.648     | 0.292     |
| $h_m^2$      | -                                              | 0.046   | -       | -       | -       | -         | -         |

**Table S2.** Genes in significant genomics regions associated with reproductive traits in Nelore cattle.

| Trait                                    |                                                                                                                                                                                                                                                                                                                                                                                                                                                                                                                                                                                                                                                                                                                                                                                                                                                                                                                                                                                                                                                                                        |
|------------------------------------------|----------------------------------------------------------------------------------------------------------------------------------------------------------------------------------------------------------------------------------------------------------------------------------------------------------------------------------------------------------------------------------------------------------------------------------------------------------------------------------------------------------------------------------------------------------------------------------------------------------------------------------------------------------------------------------------------------------------------------------------------------------------------------------------------------------------------------------------------------------------------------------------------------------------------------------------------------------------------------------------------------------------------------------------------------------------------------------------|
| Chromosome: Position(pb)                 | Gene                                                                                                                                                                                                                                                                                                                                                                                                                                                                                                                                                                                                                                                                                                                                                                                                                                                                                                                                                                                                                                                                                   |
| Scrotal circumference at 450 days of age |                                                                                                                                                                                                                                                                                                                                                                                                                                                                                                                                                                                                                                                                                                                                                                                                                                                                                                                                                                                                                                                                                        |
| 19:16748888-16777564                     | ASIC2                                                                                                                                                                                                                                                                                                                                                                                                                                                                                                                                                                                                                                                                                                                                                                                                                                                                                                                                                                                                                                                                                  |
| 26:489143-4913438                        | UBE2D1, CISD1, IPMK, ZWINT, ENSBTAG00000023971, ENSBTAG00000048299, ENSBTAG00000047692                                                                                                                                                                                                                                                                                                                                                                                                                                                                                                                                                                                                                                                                                                                                                                                                                                                                                                                                                                                                 |
| Gestation length, as a calf trait        |                                                                                                                                                                                                                                                                                                                                                                                                                                                                                                                                                                                                                                                                                                                                                                                                                                                                                                                                                                                                                                                                                        |
| 13:75605755-75651541                     | CDH22                                                                                                                                                                                                                                                                                                                                                                                                                                                                                                                                                                                                                                                                                                                                                                                                                                                                                                                                                                                                                                                                                  |
| Age at first calving                     |                                                                                                                                                                                                                                                                                                                                                                                                                                                                                                                                                                                                                                                                                                                                                                                                                                                                                                                                                                                                                                                                                        |
| 11:21246-21281912                        | ENSBTAG00000038257, ZC3H6, ZC3H8, FBLN7, TMEM87B, ENSBTAG00000044282, RF00401, MERTK, RF00156, ANAPC1, RF00026, ENSBTAG00000023163, BCL2L11, ACOXL, BUB1, TPC3, ENSBTAG00000045538, NPHP1, MALL, MAL, ENSBTAG00000034657, MRPS5, ZNF514, ZNF2, ENSBTAG00000047503, PROM2, ENSBTAG00000017955, FAHD2A, GPAT2, ADRA2B, ASTL, DUSP2, STARD7, TMEM127, CIAO1, SNRNP200, ENSBTAG00000047659, ITPRIPL1, NCAPH, NEURL3, ARID5A, KANSL3, FER1L5, LMAN2L, CNNM4, CNNM3, ANKRD23, ANKRD39, SEMA4C, FAM178B, COX5B, ACTR1B, ZAP70, TMEM131, VWA3B, CNGA3, INPP4A, COA5, UNC50, MGAT4A, RF00425, TSGA10, C2orf15, LIPT1, MITD1, MRPL30, LYG2, TXNDC9, EIF5B, REV1, ENSBTAG00000012449, LONRF2, CHST10, NMS, PDCL3, PTPN13, ENSBTAG00000016794, NPAS2, RPL31, TBC1D8, CNOT11, RF00578, RNF149, CREG2, RFX8, MAP4K4, IL1R2, RF00594, IL1R1, RF00001, ENSBTAG00000046579, IL1RL2, IL1RL1, IL18R1, IL18RAP, SLC9A4, SLC9A2, MFSD9, TMEM182, MRPS9, GPR45, TGFBRAP1, C11H2orf49, FHL2, TACR1, POLE4, HK2, ENSBTAG00000044983, SEMA4F, M1AP, DOK1, LOXL3, HTRA2, AUP1, DQX1, TLX2, PCGF1, LBX2, CCDC142, |

MRPL53, MOGS, WBP1, INO80B, RTKN, WDR54, C11H2orf81, MGC152281, DCTN1, SLC4A5, ENSBTAG00000010072, MTHFD2, MOB1A, BOLA3, TET3, DGUOK, ACTG2, STAMBP, C2orf78, DUSP11, bta-mir-2295, TPRKB, NAT8, ALMS1, EGR4, FBXO41, CCT7, PRADC1, SMYD5, NOTO, ENSBTAG00000008035, RF00100, RAB11FIP5, bta-mir-2294, SFXN5, EMX1, SPR, EXOC6B, ENSBTAG00000046679, ENSBTAG00000039263, CYP26B1, DYSF, ZNF638, PAIP2B, NAGK, TEX261, ANKRD53, ATP6V1B1, VAX2, CD207, CLEC4F, FIGLA, ADD2, TGFA, FAM136A, XDH, SRD5A2, MEMO1, ENSBTAG00000033887, DPY30, SPAST, SLC30A6, NLRC4, YIPF4, BIRC6, TTC27, ENSBTAG00000037357, LTBP1, RASGRP3, ENSBTAG00000045057, FAM98A, RF00066, RF00015, CRIM1, FEZ2, VIT, STRN, HEATR5B, GPATCH11, EIF2AK2, SULT6B1, CEBPZ, NDUFAF7, PRKD3, QPCT, CDC42EP3, RMDN2, CYP1B1, ATL2, RF01161, HNRNPLL, ENSBTAG00000044545, ENSBTAG00000026809, GALM, SRSF7, ENSBTAG00000012984, GEMIN6, DHX57, MORN2, ARHGEF33

11:21287816-21311113

ARHGEF33

### Accumulated productivity

1:2054452-20570066

PAXB1, SYNJ1, SYNJ1, CFAP298, EVA1C, URB1, MRAP, MIS18A, HUNK, SCAF4, SOD1, TIAM1, TIAM1, bta-mir-2284i, bta-mir-2284x, ENSBTAG00000004530, KRTAP11-1, KRTAP7-1, KRTAP8-1, ENSBTAG00000044154, RF00026, KRTAP13-1, ENSBTAG00000037933, KRTAP27-1, KRTAP24-1, CLDN8, CLDN17, ENSBTAG00000030124, GRIK1, GRIK1, ENSBTAG00000045873, RF00026, BACH1, MAP3K7CL, CCT8, USP16, RWDD2B, RWDD2B, LTN1, ENSBTAG00000038433, N6AMT1, RF00026, ENSBTAG00000040155, RF00432, ADAMTS5, ADAMTS1, RF00026, ENSBTAG00000005742, RF00026, APP, RF00026, GABPA, ATP5PF, ATP5PF, JAM2, MRPL39, bta-mir-155, RF00026, RF00026, ENSBTAG00000038900, ENSBTAG00000048165, RF00100, NCAM2, RF00001, ENSBTAG00000039704, RF00026, RF00001, RF00001, TMPRSS15, TMPRSS15, CHODL, C1H21orf91, RF00026, ENSBTAG00000047943, BTG3, CXADR, RF00100, ENSBTAG00000040418, bta-mir-125b-2, MIRLET7C, bta-mir-99a, ENSBTAG00000047183, RF00026

3:7752656-7785494

ATF6

6:1442287-14434633

MARCH1, TMA16, TKTL2, NPY5R, NPY1R, NAF1, RF00026, BBS7, CCNA2, EXOSC9, ANXA5, RF00012, RF00026, QRFPR, NDNF, PRDM5, RF00026, RF00001, ENSBTAG00000037426, ENSBTAG00000047900, ENSBTAG00000024874, ENSBTAG00000035129, ENSBTAG00000035129, MAD2L1, ENSBTAG00000035764, ENSBTAG00000035764, ENSBTAG00000040228, ENSBTAG00000037311, PDE5A, FABP2, C6H4orf3, USP53, RF00001, MYOZ2, SYNPO2, SEC24D, METTL14, PRSS12, RF00399, ENSBTAG00000010010, NDST3, NDST3, ENSBTAG00000034844, RF00001, RF00001, RF00001, RF00001, RF00001, RF00001, RF00001, ENSBTAG00000034849, TRAM1L1, ENSBTAG00000000119, ENSBTAG00000009280, NDST4, UGT8, ENSBTAG00000011299, ARSJ, CAMK2D, CAMK2D, ENSBTAG00000002392, ENSBTAG00000002392, ENSBTAG00000002392, LARP7, bta-mir-302b, bta-mir-302c, bta-mir-302a, bta-mir-302d, bta-mir-367, ENSBTAG00000026936, ENSBTAG00000013198, NEUROG2, ALPK1, ALPK1, ALPK1, TIFA, AP1AR

6:94344402-94375956

MRPL1

6:94388672-94426934

MRPL1

16:1706924-17085278

SOX13, ETNK2, REN, KISS1, GOLT1A, PLEKHA6, PLEKHA6, PLEKHA6, PPP1R15B, PIK3C2B, PIK3C2B, RF00334, MDM4, ENSBTAG00000026068, ENSBTAG00000034611, LRRN2, RF01169, NFASC, CNTN2, TMEM81, RBBP5, DSTYK, TMCC2, TMCC2, NUAKE2, ENSBTAG00000047727, KLHDC8A, LEMD1, bta-mir-135b, CDK18, MFSD4A, ELK4, ELK4, SLC45A3, NUCKS1, RAB29, SLC41A1, PM20D1, SLC26A9, RAB7B, RHEX, AVPR1B, FAM72A, SRGAP2, IKBKE, RASSF5, EIF2D, DYRK3, MAPKAPK2, IL10, IL19, IL19, IL20, PIGR, PIGR, PIGR, FCAMR, FCMR, IL24, ENSBTAG00000046946, C16H1orf116, YOD1, PFKFB2, PFKFB2, C4BPB, C4BPA, C4BPA, ENSBTAG00000039196, ENSBTAG00000047621, CD55, CD55, CD55, ENSBTAG00000045783, CR2, CR2, ENSBTAG00000023177, ENSBTAG00000024647, ENSBTAG00000047228, ENSBTAG00000040409, CFH, ENSBTAG00000047966, KCNT2, ENSBTAG00000044933, ENSBTAG00000025113, ENSBTAG00000020953, RF00019, ENSBTAG00000014862, RF00004, ENSBTAG00000012765, CDC73, ENSBTAG00000047703, ENSBTAG00000046060, B3GALT2, GLRX2, TROVE2,

UCHL5, ENSBTAG00000044446, RGS2, RGS13, RGS1, RGS21, RGS18, RF00001, RF00156, BRINP3, ENSBTAG00000045416, RF00001, RF00026

### Heifer early calving until 30 months

11:11320434-11348287

RAB11FIP5

11:11355768-11368368

RAB11FIP5, SFXN5

11:11374317-11381414

SFXN5

11:11410105-11424583

SFXN5

11:11439886-11463529

SFXN5

11:11496633-11536209

EMX1

11:67791729-67805289

ENSBTAG00000047822

13:64212843-64261331

RF00045, ASIP, AHCY

13:6426382-64340236

SPTLC3, RF00273, ISM1, TASP1, TASP1, ESF1, NDUFAF5, SEL1L2, FLRT3, MACROD2, KIF16B, ENSBTAG00000032609, SNRPB2, OTOR, NANP, ENSBTAG00000023169, ENSBTAG00000004354, ENSBTAG00000022922, ENSBTAG00000022922, ENSBTAG00000040046, CCDC3, CAMK1D, RF00619, CDC123, NUDT5, SEC61A2, DHTKD1, UPF2, RF00012, PROSER2, ECHDC3, USP6NL, CELF2, RF00026, ENSBTAG00000045874, ENSBTAG00000048047, ENSBTAG00000048047, GATA3, TAF3, ATP5F1C, KIN, ITIH2, ENSBTAG00000037516, ITIH5, SFMBT2, RF00026, RF00026, PRKCQ, PFKFB3, RBM17, IL2RA, IL2RA, ENSBTAG00000006078, FBH1, ENSBTAG00000036222, ENSBTAG00000036222, ENSBTAG00000017012, ENSBTAG00000022931, ENSBTAG00000022931, ENSBTAG00000034145, ANKRD26, YME1L1, MASTL, ACBD5, ACBD5, ABI1, PDSS1, APBB1IP, CCNY, CREM, CREM, CUL2, PARD3, NRP1, ITGB1, ITGB1, CCDC7, ARL5B, ENSBTAG00000047430, ENSBTAG00000037969, MALRD1, ENSBTAG00000044751, RF00026, PLXDC2, NEBL, ENSBTAG00000003937, SKIDA1, MLLT10, DNAJC1, DNAJC1, ENSBTAG00000044566, ENSBTAG00000025968, BMI1, SPAG6, COMMD3, PIP4K2A, RF00020, RF00026, RF00019, ARMC3, ARMC3, MSRB2, PTF1A, ENSBTAG00000044137, ENSBTAG00000044137, OTUD1, RF00100, RF00425, ENSBTAG00000040232, KIAA1217, ARHGAP21, ENSBTAG00000044011, ENKUR, RF00026, THNSL1, GPR158, MYO3A, GAD2, GJD4, FZD8, ENSBTAG00000047440, ENSBTAG00000044876, RF00619, OPTN, MCM10, ENSBTAG00000047869, PHYH, SEPHS1, BEND7, PRPF18, FRMD4A, FAM107B, CDNF, HSPA14, ENSBTAG00000045609, RF00099, SUV39H2, DCLRE1C, MEIG1, OLAH, ACBD7, RPP38, NMT2, NMT2, FAM171A1, RF00026, ITGA8, MINDY3, PTER, C1QL3, RSU1, CUBN, TRDMT1, VIM, ST8SIA6, HACD1, STAM, RF00153, TMEM236, MRC1, SLC39A12, CACNB2, NSUN6, EPC1, ENSBTAG00000043839, KIF5B, RF00026, ARHGAP12, ZEB1, RF01233, ZNF438, ENSBTAG00000027444, ENSBTAG00000027444, ENSBTAG00000027444, ENSBTAG00000046981, ENSBTAG00000046352, JCAD, MTPAP, MAP3K8, LYZL1, BAMBI, WAC, MPP7, ARMC4, MKX, RAB18, ENSBTAG00000048079, PCSK2, PCSK2, ENSBTAG00000006043, BFSP1, DSTN, RRBP1, BANF2, SNX5, RF00567, MGME1, OVOL2, OVOL2, KAT14, ZNF133, ZNF133, DZANK1, POLR3F, RBBP9, SEC23B, DTD1, ENSBTAG00000012276, RF00001, SCP2D1, SLC24A3, ENSBTAG00000032893, RIN2, bta-mir-2305, NAA20, CRNKL1, CFAP61, INSM1, RALGAPA2, RF00156, KIZ, XRN2, NKX2-4, NKX2-2, ENSBTAG00000035643, PAX1, FOXA2, RF00026, THBD, CD93, NXT1, GZF1, NAPB, CSTL1, CST11, CST11, CST11, MGC133636, ENSBTAG00000027420, CST8, CST8, ENSBTAG00000015949, ENSBTAG00000047137, ENSBTAG00000032687, CST3, SYNDIG1, CST7, CST7, APMAP, ENTPD6, ACSS1, VSX1, PYGB, ABHD12, ANKRD16, ENSBTAG00000035572, ENSBTAG00000002446, GDI2, FAM208B, RF00322, ASB13, ENSBTAG00000027416, CALML5, NET1, UCN3, TUBAL3, TUBAL3, ENSBTAG00000037509, ENSBTAG00000039722, ENSBTAG00000039643, ENSBTAG00000017938, ENSBTAG00000027419, AKR1C3, AKR1C4, AKR1C4, ENSBTAG00000039289, ENSBTAG00000021368,

ENSBTAG00000022570, 20ALPHA-HSD, AKR1E2, ENSBTAG00000017191, KLF6, ENSBTAG00000046128, PITRM1, PFKP, RF00402, ADARB2, ENSBTAG00000039356, ENSBTAG00000039356, ENSBTAG00000039356, ENSBTAG00000037833, WDR37, IDI1, GTPBP4, RF00026, LARP4B, DIP2C, RF00026, RF00089, ZMYND11, ZMYND11, PRNP, PRND, RASSF2, RF00026, SLC23A2, TMEM230, PCNA, CDS2, RF00377, ENSBTAG00000020668, PROKR2, GPCPD1, SHLD1, CHGB, TRMT6, MCM8, CRLS1, LRRN4, FERMT1, ENSBTAG00000046562, BMP2, ENSBTAG00000048291, ENSBTAG00000045753, ENSBTAG00000046276, ENSBTAG00000046776, ENSBTAG00000047638, ENSBTAG00000047320, ENSBTAG00000047962, ENSBTAG00000048089, ENSBTAG00000047653, ENSBTAG00000047102, ENSBTAG00000046716, ENSBTAG00000045555, ENSBTAG00000046631, ENSBTAG00000007199, HAO1, HAO1, ENSBTAG00000032156, ADRA1D, SMOX, RNF24, PANK2, bta-mir-103-2, MAVS, AP5S1, CDC25B, CENPB, SPEF1, C13H20orf27, HSPA12B, ENSBTAG00000027412, SIGLEC1, ADAM33, GFRA4, GFRA4, ATRN, C13H20orf194, C13H20orf194, C13H20orf194, SLC4A11, ITPA, DDRGK1, LZTS3, UBOX5, AVP, OXT, MRPS26, PTPRA, VPS16, PCED1A, TMEM239, C13H20orf141, CPXM1, CPXM1, EBF4, IDH3B, IDH3B, NOP56, RF00274, RF00275, RF00594, RF00432, RF00610, TMC2, SNRPB, RF00570, TGM6, TGM3, ENSBTAG00000022534, RF00156, STK35, PDYN, SIRPA, SIRPA, ENSBTAG00000048087, ENSBTAG00000039016, ENSBTAG00000039016, SIRPB1, SIRPB1, ENSBTAG00000011638, ENSBTAG00000027221, GINS1, PCMTD2, MYT1, NPBWR2, OPRL1, LKAAEAR1, RGS19, TCEA2, SOX18, PRPF6, RF00026, SAMD10, ZNF512B, ZNF512B, UCKL1, bta-mir-1388, DNAJC5, DNAJC5, TPD52L2, TPD52L2, ABHD16B, ZBTB46, SLC2A4RG, ENSBTAG00000007501, ZGPAT, ZGPAT, ARFRP1, TNFRSF6B, ENSBTAG00000047150, ENSBTAG00000047150, ENSBTAG00000047150, RTEL1, STMN3, GMEB2, FNDC11, SRMS, PTK6, PPDPF, EEF1A2, KCNQ2, KCNQ2, ENSBTAG00000031764, CHRNA4, COL20A1, COL20A1, COL20A1, ARFGAP1, ARFGAP1, BIRC7, BIRC7, YTHDF1, bta-mir-124b, RF00635, BHLHE23, SLC17A9, GID8, DIDO1, ENSBTAG00000046520, COL9A3, OGFR, MRGBP, NTSR1, SLCO4A1, bta-mir-133a-1, bta-mir-1-1, GATA5, RBBP8NL, CABLES2, RPS21, bta-mir-2306, LAMA5, ADRM1, ADRM1, OSBPL2, OSBPL2, OSBPL2, PSMA7, ENSBTAG00000021558, HRH3, MTG2, SS18L1, TAF4, TAF4, CDH4, CDH26, FAM217B, PPP1R3D, SYCP2, PHACTR3, EDN3, ZNF831, PRELID3B, ATP5F1E, TUBB1, CTSZ, NELFCD, GNAS, GNAS, GNAS, GNAS, bta-mir-296, NPEPL1, ENSBTAG00000003872, ENSBTAG00000038838, APCDD1L, VAPB, RAB22A, ANKRD60, C13H20orf85, PMEPA1, ZBP1, ZBP1, ZBP1, PCK1, CTCFL, RBM38, RAE1, SPO11, ENSBTAG00000047773, BMP7, bta-mir-2307, ENSBTAG00000037492, TFAP2C, ENSBTAG00000024608, FAM209A, RTF2, GCNT7, CASS4, RF00001, CSTF1, AURKA, FAM210B, MC3R, SIRPD, ENSBTAG00000006539, NSFL1C, FKBP1A, SDCBP2, SNPH, RAD21L1, TMEM74B, PSMF1, RSPO4, ANGPT4, FAM110A, SLC52A3, SRXN1, TCF15, CSNK2A1, TBC1D20, RBCK1, TRIB3, NRSN2, ENSBTAG00000027386, ZCCHC3, C13H20orf96, DEFB129, ENSBTAG00000048009, DEFB119, DEFB119, DEFB122A, DEFB122, DEFB123, DEFB124, REM1, HM13, ID1, COX4I2, BCL2L1, TPX2, MYLK2, FOXS1, ENSBTAG00000031214, DUSP15, TTLL9, PDRG1, XKR7, CCM2L, HCK, HCK, TM9SF4, PLAGL2, POFUT1, POFUT1, POFUT1, POFUT1, KIF3B, ASXL1, NOL4L, NOL4L, COMMD7, DNMT3B, MAPRE1, SUN5, RF00026, BPIFB2, BPIFB6, BPIFB6, BPIFB6, BPIFB3, BPIFB4, ENSBTAG00000038453, BPIFA2A, BPIFA2C, ENSBTAG00000031375, ENSBTAG00000011704, BPIFA2B, ENSBTAG00000031373, BPIFA3, BPIFA3, BPIFA1, BPIFB1, BPIFB5, ENSBTAG00000031354, CDK5RAP1, SNTA1, ENSBTAG00000014869, CBFA2T2, NECAB3, C13H20orf144, C13H20orf144, ACTL10, E2F1, PXMP4, ZNF341, ZNF341, CHMP4B, RALY, EIF2S2, RF00045, ASIP, AHCY

---

13:64358933-64432139

ITCH, ENSBTAG00000046623

---

13:64450162-64500844

ITCH, DYNLRB1, MAP1LC3A, PIGU

---

25:18619922-18639119

ACSM3

---

25:18672747-18714923

REXO5

---

25:18946238-18966876

DNAH3

---

### Stayability

1:33285504-33305018

CADM2

3:43009131-43028743

CDC14A

4:55984897-56013042

ZNF277

11:1424088-1433201

ACOXL

13:1339928-13434427

PLCB1, PLCB4, LAMP5, PAK5, ENSBTAG00000046074, RF00408, MRPL33, ANKEF1, SNAP25, MKKS, RF00026, SLX4IP, JAG1, SRY, BTBD3, RF00156, ENSBTAG00000045631, SPTLC3, RF00273, ISM1, TASP1, TASP1, ESF1, NDUFAF5, SEL1L2, FLRT3, MACROD2, KIF16B, ENSBTAG00000032609, SNRNP2, OTOR, NANP, ENSBTAG00000023169, ENSBTAG00000004354, ENSBTAG00000022922, ENSBTAG00000022922, ENSBTAG00000040046, CCDC3, CAMK1D, RF00619, CDC123, NUDT5, SEC61A2, DHTKD1, UPF2, RF00012, PROSER2, ECHDC3, USP6NL, CELF2

**Table S3.** Enriched GO terms and KEGG pathways significantly enriched ( $\leq 0.05$ ) from DAVID software for age at first calving.

| Age at first calving |                                                     |       |         |            |
|----------------------|-----------------------------------------------------|-------|---------|------------|
| Category             | Term                                                | Genes | p-Value | GO Term    |
| Biological Process   | mitochondrial translational elongation              | 4     | 3,6E-2  | GO:0070125 |
|                      | mitochondrial translational initiation              | 4     | 3,6E-2  | GO:0070124 |
|                      | regulation of intracellular pH                      | 3     | 3,9E-2  | GO:0051453 |
| Cell Component       | spindle pole                                        | 4     | 3,6E-2  | GO:0000922 |
| Molecular Function   | interleukin-1, Type I, activating receptor activity | 2     | 1,9E-2  | GO:0004909 |
|                      | interleukin-1 receptor activity                     | 2     | 2,8E-2  | GO:0004908 |

**Table S4.** Enriched GO terms and KEGG pathways significantly enriched ( $\leq 0.05$ ) from DAVID software for accumulated productivity.

| Accumulated productivity |                                                                 |       |         |            |
|--------------------------|-----------------------------------------------------------------|-------|---------|------------|
| Category                 | Term                                                            | Genes | p-Value | GO Term    |
| Biological Process       | positive regulation of JAK-STAT cascade                         | 4     | 1,1E-4  | GO:0046427 |
|                          | response to organic substance                                   | 3     | 1,1E-3  | GO:0010033 |
|                          | response to hydrogen peroxide                                   | 3     | 7,8E-3  | GO:0042542 |
|                          | regulation of multicellular organism growth                     | 3     | 1,2E-2  | GO:0040014 |
|                          | negative regulation of complement activation, classical pathway | 2     | 1,5E-2  | GO:0045959 |
|                          | protein phosphorylation                                         | 5     | 1,9E-2  | GO:0006468 |
|                          | protein localization to paranode region of axon                 | 2     | 2,9E-2  | GO:0002175 |
|                          | metabolic process                                               | 4     | 3,1E-2  | GO:0008152 |
|                          | relaxation of cardiac muscle                                    | 2     | 3,7E-2  | GO:0055119 |
|                          | relaxation of vascular smooth muscle                            | 2     | 4,4E-2  | GO:0060087 |
| Cell Component           | paranodal junction assembly                                     | 2     | 4,4E-2  | GO:0030913 |
|                          | other organism cell                                             | 2     | 1,5E-2  | GO:0044216 |
|                          | basolateral plasma membrane                                     | 4     | 3,9E-2  | GO:0016323 |
| Molecular function       | cytosol                                                         | 14    | 4,3E-2  | GO:0005829 |
|                          | heparin binding                                                 | 5     | 8,2E-3  | GO:0008201 |
|                          | GTPase activator activity                                       | 6     | 1,2E-2  | GO:0005096 |
|                          | pancreatic polypeptide receptor activity                        | 2     | 2,2E-2  | GO:0001602 |
|                          | [heparan sulfate-glucosamine N-sulfotransferase activity        | 2     | 3,0E-2  | GO:0015016 |
| Pathway                  | peptide YY receptor activity                                    | 2     | 3,0E-2  | GO:0001601 |
|                          | Complement and coagulation cascades                             | 5     | 2,9E-3  | -          |
|                          | Cell adhesion molecules (CAMs)                                  | 6     | 7,7E-3  | -          |

MicroRNAs in cancer

6

4,8E-2

-

**Table S5.** Enriched GO terms and KEGG pathways significantly enriched ( $\leq 0.05$ ) from DAVID software for heifer early calving until 30 months.

| Heifer early calving until 30 months |                                                             |       |         |            |
|--------------------------------------|-------------------------------------------------------------|-------|---------|------------|
| Category                             | Term                                                        | Genes | p-Value | GO Term    |
| Biological Process                   | negative regulation of cysteine-type endopeptidase activity | 9     | 1,3E-11 | GO:2000117 |
|                                      | innate immune response                                      | 15    | 9,6E-4  | GO:0045087 |
|                                      | fatty acid alpha-oxidation                                  | 3     | 7,8E-3  | GO:0001561 |
|                                      | defense response to bacterium                               | 7     | 1,2E-2  | GO:0042742 |
|                                      | negative regulation of transcription, DNA-templated         | 13    | 1,8E-2  | GO:0045892 |
|                                      | negative regulation of sequence-specific DNA binding        | 5     | 1,9E-2  | GO:0043433 |
|                                      | transcription factor activity                               | 3     | 2,6E-2  | GO:1990138 |
|                                      | neuron projection extension                                 | 3     | 3,6E-2  | GO:0030705 |
|                                      | cytoskeleton-dependent intracellular transport              | 5     | 4,0E-2  | GO:0007018 |
|                                      | microtubule-based movement                                  | 4     | 4,5E-2  | GO:0045599 |
| Cell Component                       | negative regulation of fat cell differentiation             | 2     | 4,6E-2  | GO:1902305 |
|                                      | regulation of sodium ion transmembrane transport            | 16    | 7,7E-3  | GO:0009986 |
|                                      | cell surface                                                | 20    | 1,9E-2  | GO:0005576 |
|                                      | extracellular region                                        | 9     | 2,1E-2  | GO:0005874 |
|                                      | microtubule                                                 | 5     | 3,4E-2  | GO:0031234 |
| Molecular Function                   | extrinsic component of cytoplasmic side of plasma membrane  | 10    | 7,5E-9  | GO:0004869 |
|                                      | cysteine-type endopeptidase inhibitor activity              | 10    | 3,0E-8  | GO:0002020 |
|                                      | protease binding                                            | 14    | 6,8E-8  | GO:0008289 |
|                                      | lipid binding                                               | 12    | 5,5E-5  | GO:0016491 |
|                                      | oxidoreductase activity                                     | 2     | 4,7E-2  | GO:0005185 |
|                                      | neurohypophyseal hormone activity                           | 2     | 4,7E-2  | GO:0048244 |
| Pathway                              | phytanoyl-CoA dioxygenase activity                          | 7     | 3,0E-3  | -          |
|                                      | ribosome biogenesis in eukaryotes                           |       |         |            |

**Table S6.** Enriched GO terms and KEGG pathways significantly enriched ( $\leq 0.05$ ) from DAVID software for stayability.

| Stayability        |                                               |       |         |            |
|--------------------|-----------------------------------------------|-------|---------|------------|
| Category           | Term                                          | Genes | p-Value | GO Term    |
| Biological Process | cerebral cortex development                   | 3     | 2,1E-3  | GO:0021987 |
| Molecular Function | phosphatidylinositol phospholipase C activity | 2     | 2,8E-2  | GO:0004435 |
| Pathway            | Aldosterone synthesis and secretion           | 3     | 9,0E-3  | -          |
|                    | Insulin secretion                             | 3     | 9,7E-3  | -          |
|                    | Sphingolipid signaling pathway                | 3     | 2,0E-2  | -          |
|                    | Oxytocin signaling pathway                    | 3     | 3,1E-2  | -          |

**Table S7.** Common gene list associated with de with reproductive traits in Nelore cattle.

| Traits            | Total Common Genes                                                                                                                                                                                                                                                                                          |
|-------------------|-------------------------------------------------------------------------------------------------------------------------------------------------------------------------------------------------------------------------------------------------------------------------------------------------------------|
| AFC and STAY: 1   | ACOXL                                                                                                                                                                                                                                                                                                       |
| AFC and HC30: 3   | RAB11FIP5, SFXN5, EMX1                                                                                                                                                                                                                                                                                      |
| HC30 and STAY: 31 | SPTLC3, RF00273, ISM1, TASP1, ESF1, NDUFAF5, SEL1L2, FLRT3, MACROD2, KIF16B, ENSBTAG00000032609, SNRNPB2, OTOR, NANP, ENSBTAG00000023169, ENSBTAG00000004354, ENSBTAG00000022922, ENSBTAG00000040046, CCDC3, CAMK1D, RF00619, CDC123, NUDT5, SEC61A2, DHTKD1, UPF2, RF00012, PROSER2, ECHDC3, USP6NL, CELF2 |
